# Supplementary material for: Synthesis of ultrahigh-molecular-weight ethylene/1-octene copolymers with salalen titanium(iv) complexes activated by methyaluminoxane
Source: Royal Society of Chemistry journal article supplement (doi:10.1039/d2ra00165a), 2022-01-01
Supplement: d2ra00165a1.pdf [file d2ra00165a1.pdf]

## Supporting Information

### **Synthesis of Ultrahigh-Molecular-Weight Ethylene/1-Octene Copolymers with Salalen Titanium (IV) Complexes Activated by Methyaluminoxane**

*Baokang Zou<sup>1</sup>, Yipeng Zhan<sup>1</sup>, Xiuli Xie<sup>1</sup>, TongTong Zhang<sup>1</sup>, Runkai Qiu<sup>1</sup>, Fangming  
Zhu<sup>1, 2</sup>*

<sup>1</sup>GDHPPCLab, School of Chemistry, Sun Yat-Sen University, 510275, China

<sup>2</sup>Key Lab for Polymer Composite and Functional Materials of Ministry of Education,  
School of Chemistry, Sun Yat-Sen University, Guangzhou, 510275, China

## 1. Synthesis of Salalen titanium complexes

The related ligands and final complexes were synthesized by the following synthetic routes<sup>1</sup>:

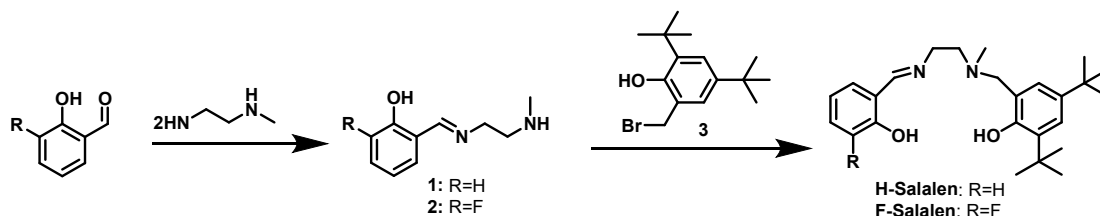

### 1.1 Synthesis of 2-[[[(methylamino)ethylimino)methyl]-phenol

N-Methylethylenediamine (1.12g, 15.2 mmol) was added to the toluene solution (30ml) of salicylaldehyde (1.8g, 15.2 mmol), followed by refluxing for 120 minutes. Then the toluene was removed by evaporation under vacuum to obtain a yellow oil for direct use, with a yield of 97 %. <sup>1</sup>H NMR (500 MHz, CDCl<sub>3</sub>)  $\delta$  2.36 (s, 3H, CH<sub>3</sub>), 2.83 (t, 2H, CH<sub>2</sub>), 3.62 (t, 2H, CH<sub>2</sub>), 6.75 - 6.89 (m, 2H, ArH), 7.13-7.22 (m, 2H, ArH), 8.28 (s, 1H, N=CH). <sup>13</sup>C NMR (125 MHz, CDCl<sub>3</sub>)  $\delta$  36.3 (CH<sub>3</sub>), 51.9, 59.6 (CH<sub>2</sub>), 117.2, 118.5, 131.4, 132.4, (Ar-CH), 138.5 (Ar-C), 161.4 (Ar-O), 166.1 (CH). Anal. Calcd for C<sub>10</sub>H<sub>14</sub>N<sub>2</sub>O: C, 67.39; H, 7.92; N, 15.72. Found: C, 67.43; H, 7.95; N, 15.78.

### 1.2 Synthesis of 2-[[[(methylamino)ethylimino)methyl]-6-fluorinephenol

N-Methylethylenediamine (1.12g, 15.2 mmol) was added to the toluene solution (30ml) of 3-fluoro-2-hydroxybenzaldehyde (2.1g, 15.2 mmol), followed refluxing for 120 minutes. Then the toluene was removed by evaporation under vacuum to obtain a brown oil for direct use, with a yield of 93 %. <sup>1</sup>H NMR (500 MHz, CDCl<sub>3</sub>)  $\delta$  2.46 (s, 3H, CH<sub>3</sub>), 2.93 (t, 2H, CH<sub>2</sub>), 3.74 (t, 2H, CH<sub>2</sub>), 6.86 (t, 1H, ArH), 6.94 (d, 1H, ArH), 7.28 (d, 1H, ArH), 8.39 (s, 1H, N=CH). <sup>13</sup>C NMR (125 MHz, CDCl<sub>3</sub>)  $\delta$  36.3 (CH<sub>3</sub>), 48.9, 51.5 (CH<sub>2</sub>), 117.5, 125.6, 128.8, 130.2 (Ar-C), 151.1 (Ar-O), 154.3 (Ar-F), 161.2 (CH). Anal. Calcd for C<sub>10</sub>H<sub>13</sub>FN<sub>2</sub>O: C, 61.21; H, 6.68; N, 9.68. Found: C, 61.25; H, 6.62; N, 9.62

### 1.3 Synthesis of 2-(bromomethyl)-4,6-di-tert-butylphenol

2,4-di-tert-butylpheno (1.7 g, 42.2 mmol) of was added to 25 ml glacial acetic acid, and stirred to sufficiently dissolved. Then paraformaldehyde (1.4g, 46.7mmol) was added to the solution and continued to stir at room temperature for 120 minutes. HBr solution in acetic acid (45 ml, 33 wt %) was added dropwise to the formed suspension, followed by stirring for 30 minutes. Finally orange oil was obtained by removing residual HBr and acetic acid, using n-hexene as a recrystallization solvent to produce orange crystalline, with a yield of 91 %. <sup>1</sup>H NMR (500 MHz, CDCl<sub>3</sub>)  $\delta$  1.29 (s, 9H, C(CH<sub>3</sub>)<sub>3</sub>), 1.43 (s, 9H, C(CH<sub>3</sub>)<sub>3</sub>), 4.58 (s, 2H, CH<sub>2</sub>Br), 5.28 (s, 1H, OH), 7.10 (d, 1H, ArH), 7.33 (d, 1H, ArH). <sup>13</sup>C NMR (125 MHz, CDCl<sub>3</sub>)  $\delta$  32.23, 34.14, 35.46, 37.00, 37.59, 125.93, 127.55, 128.48, 139.20, 145.91, 154.48. Calcd for C<sub>11</sub>H<sub>15</sub>BrO: C, 54.34; H, 6.22. Found: C, 54,.39; H, 6.34.

#### 1.4 Synthesis of H-Salalen ligand

THF solution of 2-(((methylamino)ethylimino)methyl)-phenol (2.44 g, 13.7 mmol) and 9 ml Triethylamine was added into 30ml THF solution of 2-(bromomethyl)-4,6-di-tert-butylphenol (4.1g, 13.7mmol), and then stirred at room temperature for 120 minutes, followed by filtration and removing solvent under vacuum. Finally, methanol was used as a recrystallization solvent to obtain yellow crystalline, with a yield of 82 %. <sup>1</sup>H NMR (500 MHz, CDCl<sub>3</sub>)  $\delta$  1.27 (s, 9H, C(CH<sub>3</sub>)<sub>3</sub>), 1.36 (s, 9H, C(CH<sub>3</sub>)<sub>3</sub>), 2.39 (s, 3H, CH<sub>3</sub>) 2.84 (t, 2H, CH<sub>2</sub>), 3.74 (s, 2H, CH<sub>2</sub>), 3.78 (t, 2H, CH<sub>2</sub>), 6.82 (s, 1H, ArH), 6.88 (t, 1H, ArH), 6.96 (d, 1H, ArH), 7.17-7.35 (m, 3H, ArH), 8.37 (s, 1H, N=CH). <sup>13</sup>C NMR (125 MHz, CDCl<sub>3</sub>)  $\delta$  29.6, 31.7, 34.2, 34.8, 42.1, 57.0, 57.6, 62.3, 117.0, 118.7, 118.8, 121.0, 123.0, 131.4, 132.4, 135.9, 140.6, 154.3, 161.0, 166.3. Anal. Calcd for C<sub>25</sub>H<sub>36</sub>N<sub>2</sub>O<sub>2</sub>: C, 75.72; H, 9.15; N, 7.06. Found: C, 75.75; H, 9.16; N, 7.05. HRMS (ESI) *m/z*: [M<sup>+</sup>H]<sup>+</sup> calcd for C<sub>25</sub>H<sub>37</sub>N<sub>2</sub>O<sub>2</sub>, 397.2855, found, 397.2842.

#### 1.5 Synthesis of F-Salalen ligand

THF solution of 2-(((methylamino)ethylimino)methyl)-6-fluorinephenol (1.96 g, 10 mmol) and 9 ml Triethylamine was added into 30ml THF solution of 2-(bromomethyl)-4,6-di-tert-butylphenol (3.29 g, 11 mmol), and then stirred at room

temperature for 120 minutes, followed by filtration and removing solvent under vacuum. Finally, methanol was used as a recrystallization solvent to obtain yellow crystalline, with a yield of 76 %.  $^1\text{H}$  NMR (500 MHz,  $\text{CDCl}_3$ )  $\delta$  1.27 (s, 9H,  $\text{C}(\text{CH}_3)_3$ ), 1.35 (s, 9H,  $\text{C}(\text{CH}_3)_3$ ), 2.39 (s, 3H,  $\text{CH}_3$ ), 2.85 (t, 2H,  $\text{CH}_2$ ), 3.74 (s, 2H,  $\text{CH}_2$ ), 3.80 (t, 2H,  $\text{CH}_2$ ), 6.74-6.84 (m, 2H), 7.03 (dd, 1H, ArH), 7.13 (td, 1H, ArH), 7.20 (dd, 1H, ArH), 8.37 (s, 1H,  $\text{N}=\text{CH}$ ).  $^{13}\text{C}$  NMR (125 MHz,  $\text{CDCl}_3$ )  $\delta$  29.5, 31.7, 34.1, 34.8, 42.1, 56.8, 57.2, 62.1, 117.7, 118.5, 120.8, 123.0, 126.4, 135.6, 140.6, 149.9, 150.4, 152.3, 154.1, 166.0.  $^{19}\text{F}$  NMR (470 MHz,  $\text{CDCl}_3$ )  $\delta$  -138.1. Calcd for  $\text{C}_{25}\text{H}_{35}\text{FN}_2\text{O}_2$ : C, 72.43; H, 8.51; N, 6.76. Found: C, 72.50; H, 8.55; N, 6.83. HRMS (ESI)  $m/z$ :  $[\text{M}^+\text{H}]^+$  calcd for  $\text{C}_{25}\text{H}_{36}\text{FN}_2\text{O}_2$ , 415.2761, found, 415.2755.

#### 1.6 Synthesis of H-Salalen titanium complex

A Schlenk flask was cooled to 0 °C after heating in vacuum and nitrogen replacement for three times, then added H-Salalen ligand (0.5797 g, 1.51 mmol) and 30 ml anhydrous ether.  $n\text{-BuLi}$  (2.5 M in hexane, 3.2 mmol) was added dropwise into the solution slowly and stirred for 60 minutes. Then,  $\text{TiCl}_4$  (1 M in toluene, 1.6 mmol) and 30 ml toluene was added to the formed solution at -78 °C, and the mixture was stirred for 60 minutes. The solution was then gradually allowed to warm to room temperature and reacted for another 120 minutes. The insoluble inorganic salts were then filtered under nitrogen atmosphere. The filtrate was evaporated in vacuum to remove solvent, and the residual solid was washed with hexane three times and dried in vacuum to give a dark red powder. Recrystallization in cold toluene gave deep red crystals with a yield of 56 %.  $^1\text{H}$  NMR (500 MHz,  $\text{C}_2\text{D}_2\text{Cl}_4$ )  $\delta$  1.09 (s, 9H,  $\text{C}(\text{CH}_3)_3^{\text{A}}$ ), 1.29 (s, 9H,  $\text{C}(\text{CH}_3)_3^{\text{A}}$ ), 1.33 (s, 9H,  $\text{C}(\text{CH}_3)_3^{\text{B}}$ ), 1.56 (s, 9H,  $\text{C}(\text{CH}_3)_3^{\text{B}}$ ), 2.67 (d, 1H,  $\text{CH}_2^{\text{A}}$ ), 2.70 (s, 3H,  $\text{CH}_3^{\text{B}}$ ), 2.75 (d, 1H,  $\text{CH}_2^{\text{B}}$ ), 3.00 (t, 1H,  $\text{CH}_2^{\text{A}}$ ), 3.05 (s, 3H,  $\text{CH}_3^{\text{A}}$ ), 3.50 (d, 1H,  $\text{CH}_2^{\text{B}}$ ), 3.58 (d, 1H,  $\text{CH}_2^{\text{A}}$ ), 3.62 (d, 1H,  $\text{CH}_2^{\text{A}}$ ), 3.86–3.98 (m, 2H,  $\text{CH}_2^{\text{B}}$ ), 4.42 (t, 1H,  $\text{CH}_2^{\text{A}}$ ), 4.45 (t, 1H,  $\text{CH}_2^{\text{B}}$ ), 5.04 (d, 1H,  $\text{CH}_2^{\text{A}}$ ), 5.36 (d, 1H,  $\text{CH}_2^{\text{B}}$ ), 6.91 (d, 1H, ArH<sup>A</sup>), 7.00 (s, 1H, Ar-H<sup>A</sup>), 7.06 (t, 1H, Ar-H<sup>A</sup>), 7.19 (s, 1H, Ar-H<sup>A</sup>), 7.27 (t, 1H, Ar-H<sup>B</sup>), 7.33 (m, 1H, Ar-H<sup>B</sup>), 7.41 (d, 1H, Ar-H<sup>A</sup>), 7.48-7.53 (m, 1H, Ar-H<sup>B</sup>), 7.56 (t, 1H, Ar-H<sup>B</sup>), 7.61 (t, 1H, Ar-H<sup>A</sup>), 8.18 (s, 1H, CH<sup>A</sup>), 8.32 (s, 1H, CH<sup>B</sup>).  $^{13}\text{C}$  NMR (125 MHz,

C<sub>2</sub>D<sub>2</sub>Cl<sub>4</sub>)  $\delta$  30.6, 31.6, 32.7, 35.6, 35.7, 54.0, 57.7, 59.6, 67.5, 116.9, 123.1, 124.4, 124.7, 125.2, 127.3, 129.4, 130.2, 134.9, 136.9, 137.6, 136.9, 160.1, 163.2, 163.4. Calcd for C<sub>25</sub>H<sub>34</sub>Cl<sub>2</sub>N<sub>2</sub>O<sub>2</sub>Ti: C, 58.50; H, 6.68; N, 5.46. Found: C, 58.49; H, 6.62; N, 5.48.

### 1.7 Synthesis of F-Salalen titanium complex

A Schlenk flask was cooled to 0 °C after heating in vacuum and nitrogen replacement for three times, then added F-Salalen ligand (0.5662 g, 1.366 mmol) and 30 ml anhydrous ether. n-BuLi (2.5 M in hexane, 2.5 mmol) was added dropwise into the solution slowly and stirred for 60 minutes. Then, TiCl<sub>4</sub> (1 M in toluene, 1.2 mmol) and 30 ml toluene was added to the formed solution at -78 °C, and the mixture was stirred for 60 minutes. The solution was then gradually allowed to warm to room temperature and reacted for another 120 minutes. The insoluble inorganic salts were then filtered under nitrogen atmosphere. The filtrate was evaporated in vacuum to remove solvent, and the residual solid was washed with hexane three times and dried in vacuum to give a dark red powder. Recrystallization in cold toluene gave red crystals with a yield of 64 %. <sup>1</sup>H NMR (500 MHz, C<sub>2</sub>D<sub>2</sub>Cl<sub>4</sub>)  $\delta$  1.08 (s, 9H, C(CH<sub>3</sub>)<sub>3</sub><sup>A</sup>), 1.29 (s, 9H, C(CH<sub>3</sub>)<sub>3</sub><sup>A</sup>), 1.33 (s, 9H, C(CH<sub>3</sub>)<sub>3</sub><sup>B</sup>), 1.55 (s, 9H, C(CH<sub>3</sub>)<sub>3</sub><sup>B</sup>), 2.69 (d, 1H, CH<sub>2</sub><sup>A</sup>), 2.71 (s, 3H, CH<sub>3</sub><sup>B</sup>), 2.80 (dd, 1H, CH<sub>2</sub><sup>B</sup>), 3.00 (t, 1H, CH<sub>2</sub><sup>A</sup>), 3.23 (s, 3H, CH<sub>3</sub><sup>A</sup>), 3.51 (d, 1H, CH<sub>2</sub><sup>B</sup>), 3.57 (d, 1H, CH<sub>2</sub><sup>A</sup>), 3.65 (d, 1H, CH<sub>2</sub><sup>A</sup>), 3.85–4.01 (m, 2H, CH<sub>2</sub><sup>B</sup>), 4.43 (t, 1H, CH<sub>2</sub><sup>A</sup>), 4.47 (t, 1H, CH<sub>2</sub><sup>B</sup>), 5.02 (d, 1H, CH<sub>2</sub><sup>A</sup>), 5.34 (d, 1H, CH<sub>2</sub><sup>B</sup>), 6.95–7.04 (m, 2H, Ar-H<sup>A</sup>), 7.06 (s, 1H, Ar-H<sup>B</sup>), 7.16–7.23 (m, 2H, Ar-H<sup>A</sup>), 7.24–7.36 (m, 4H, Ar-H<sup>B</sup>), 7.39 (t, 1H, Ar-H<sup>A</sup>), 8.21 (s, 1H, CH<sup>A</sup>), 8.35 (s, 1H, CH<sup>B</sup>). <sup>13</sup>C NMR (125 MHz, C<sub>2</sub>D<sub>2</sub>Cl<sub>4</sub>)  $\delta$  30.6, 31.6, 32.6, 35.6, 35.7, 54.3, 57.8, 59.7, 67.7, 122.5, 123.3, 123.5, 124.7, 124.7, 125.3, 126.2, 127.4, 129.8, 136.9, 147.3, 148.6, 160.1, 162.7, 162.8. <sup>19</sup>F NMR (470 MHz, C<sub>2</sub>D<sub>2</sub>Cl<sub>4</sub>)  $\delta$  -129.9 (Ar-F<sup>A</sup>), -129.0 (Ar-F<sup>B</sup>). Calcd for C<sub>25</sub>H<sub>33</sub>Cl<sub>2</sub>FN<sub>2</sub>O<sub>2</sub>Ti: C, 56.52; H, 6.26; N, 5.27. Found: C, 56.49; H, 6.29; N, 5.29.

## 2. Characterization of Poly(ethylene-*co*-1-octene) by $^{13}\text{C}$ NMR

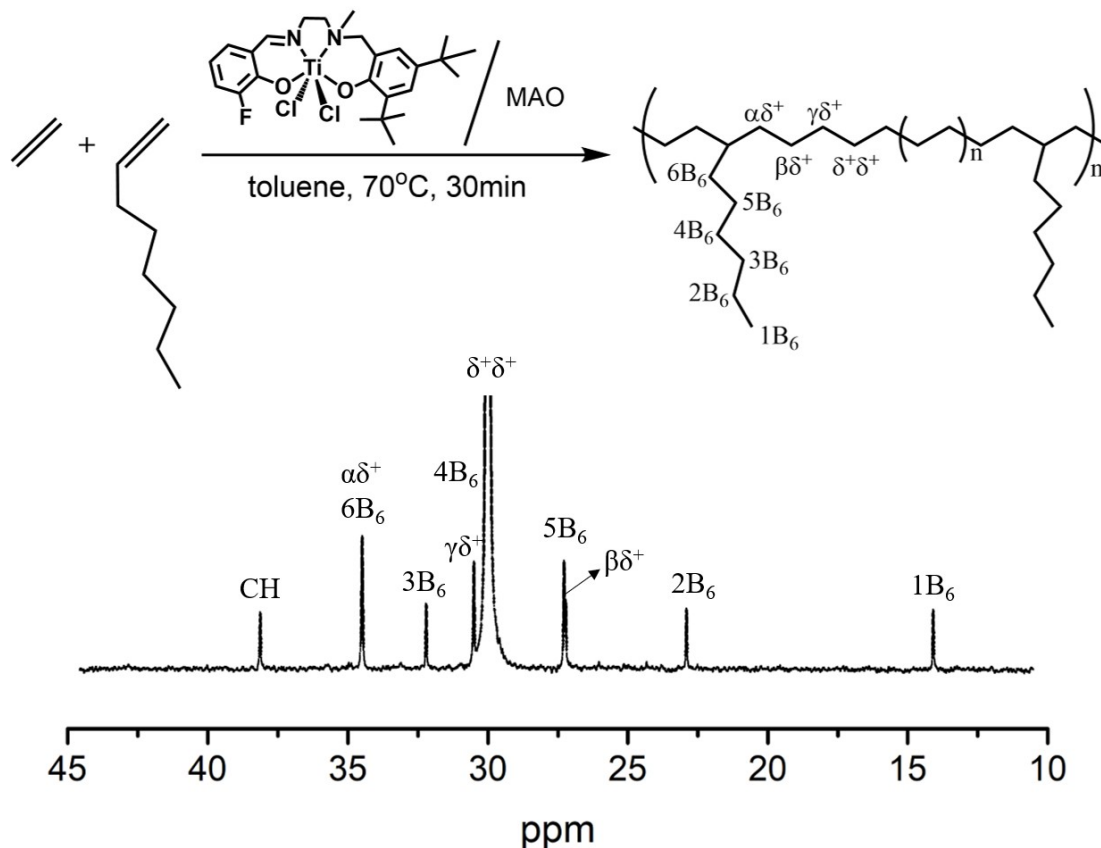

**Figure 1.**  $^{13}\text{C}$  NMR spectrum of poly(ethylene-*co*-1-octene) obtained using the (F-salalen) $\text{TiCl}_2$ /MAO (entry 6 in Table 2).

**Table 1.** Chemical shift calculated and observed and assignments of poly(ethylene-*co*-1-octene) in  $^{13}\text{C}$  NMR spectrum.

| Carbon assignments                | chemical shift (ppm)           |              | Sequence assignment |
|-----------------------------------|--------------------------------|--------------|---------------------|
|                                   | previous works <sup>2, 3</sup> | experimental |                     |
| 1B <sub>6</sub>                   | 14.02, 14.07                   | 14.01        | EOE, EOO, OOE, OOO  |
| 2B <sub>6</sub>                   | 22.84, 22.88                   | 22.90        | EOE, EOO, OOE, OOO  |
| βδ <sup>+</sup>                   | 27.33                          | 27.22        | EOE                 |
| 5B <sub>6</sub>                   | 27.33                          | 27.29        | EOEE, EEOE          |
| δ <sup>+</sup> δ <sup>+</sup>     | 29.536                         | 29.97        | (EEE) <sub>n</sub>  |
| γδ <sup>+</sup>                   | 30.476                         | 30.50        | OEEO, EEOO          |
| 3B <sub>6</sub>                   | 32.18, 32.2                    | 32.20        | EOE                 |
| αδ <sup>+</sup> , 6B <sub>6</sub> | 34.61, 34.70                   | 34.48        | EOEE, EEOE          |
| CH                                | 38.23, 38.24                   | 38.13        | EOE                 |

**Table 2** The triad and diad distributions for poly(ethylene-*co*-1-octene):E = ethylene, O= 1-octene.<sup>4-6</sup>

| [EEE] | [EEO]<br>+[OEE] | [EOE] | [OEO] | [OOE]<br>+[EOO] | [OOO] | [EE] | [EO]<br>+[OE] | [OO] | $r_E$ | $r_O$ | $r_E r_O$ |
|-------|-----------------|-------|-------|-----------------|-------|------|---------------|------|-------|-------|-----------|
| 82.6  | 11.2            | 3.8   | 1.3   | 1.0             | 0.1   | 88.2 | 11.2          | 0.6  | 11.25 | 0.15  | 1.69      |

The “E” average sequence length was calculated by <sup>13</sup>C NMR triad distribution.<sup>4</sup>

“E” average sequence length =  $[EEE + (EEO + OEE) + OEO] / [OEO + 1/2(OEE + EEO)] = 13.8$

### 3. Analysis of Wide Angle X-ray Diffraction (WAXD)

The crystal size and % crystallinity from XRD were calculated by MDI Jade.<sup>7-9</sup>

**Table 3.** The crystal parameters of entry 1, 11, 12, 13, 5, 14 calculated from XRD.

| entry          | 1    | 11   | 12   | 13   | 5    | 14   |
|----------------|------|------|------|------|------|------|
| $X_c$ (%)      | 72.7 | 68.7 | 50.1 | 43.7 | 28.4 | 23.4 |
| $D_{110}$ (nm) | 26.4 | 25.3 | 26.6 | 20.2 | 21.3 | 26.2 |
| $D_{200}$ (nm) | 22.3 | 21.9 | 21.7 | 19.5 | 18.4 | 23.1 |

### 4. Successive Self-nucleation And Annealing (SSA) test

Successive self-nucleation and annealing (SSA) analysis was carried out at the heating and cooling rates of 10 °C/min<sup>-1</sup>. Samples were first heated to 180 °C, maintained for 10 min, and cooled down to 40 °C. After 1min at 40 °C, samples were heated to the first self-nucleation temperature (T<sub>1</sub>), maintained for 10 min then cooled down to 40 °C. Successive self-nucleation was achieved by repeatedly heating to the next self-nucleation temperatures and cooling down to 40 °C. After covering the temperature range between 130 and 40 °C, the final heating ramp from 40 up to 200 °C was applied to collect all melting endotherms.<sup>10</sup>

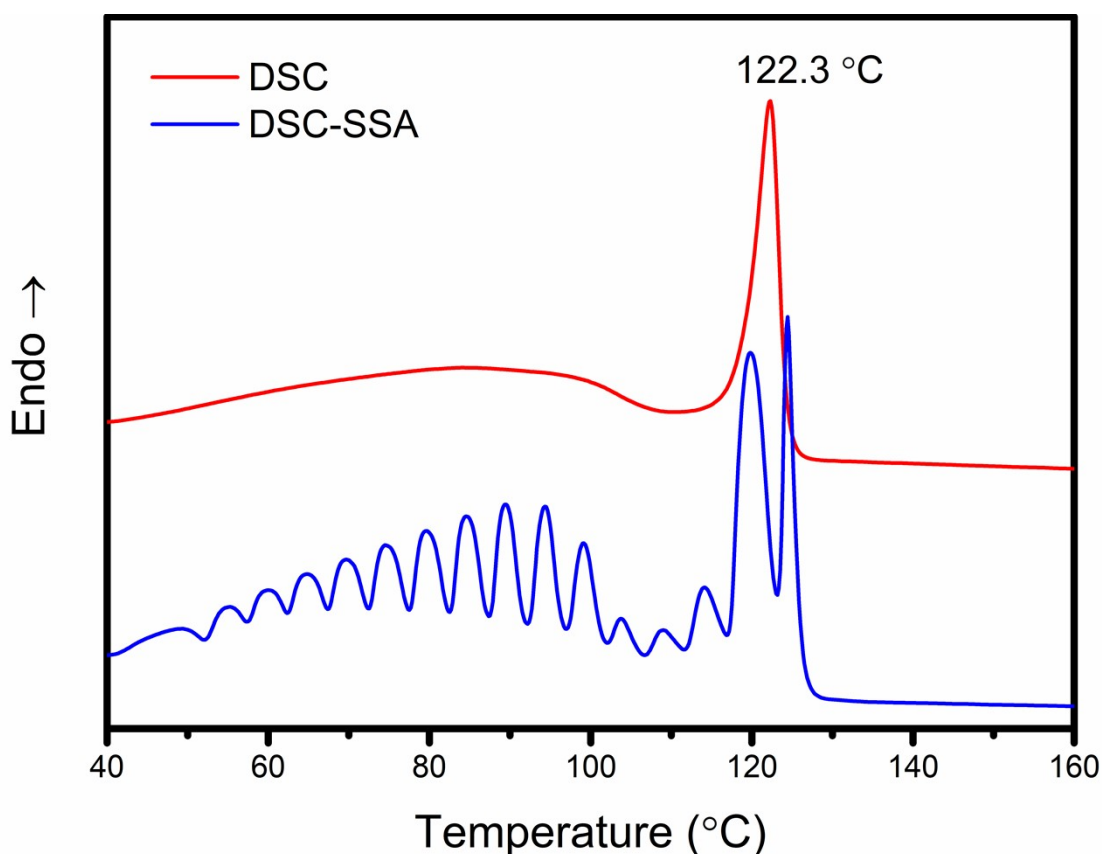

Figure 2. The DSC-SSA thermogram of entry 13.

#### 4. References

1. S. Li, Y. Zhu, H. Liang, X. Xie, Y. Zhan, G. Liang and F. Zhu, *RSC Advances*, 2019, **9**, 41824-41831.
2. G. B. Galland, R. Quijada, R. Rojas, G. Bazan and Z. J. Komon, *Macromolecules*, 2002, **35**, 339-345.
3. D. Cutler, P. Hendra, M. Cudby and H. Willis, *Polymer*, 1977, **18**, 1005-1008.
4. J. C. Randall, *Journal of Macromolecular Science—Reviews in Macromolecular Chemistry and Physics*, 1989, **29**, 201-317;
5. K. Soga, T. Uozumi, S. Nakamura, T. Toneri, T. Teranishi, T. Sano, T. Arai, T. Shiono, *Macromolecular Chemistry and Physics*, 1996, **197**, 4237-4251;
6. W. Liu, P. L. Rinaldi, L. H. McIntosh, R. P. Quirk, *Macromolecules*, 2001, **34**, 4757-4767.
7. M. Yasuniwa, S. Tsubakihara and M. J. J. o. P. S. P. B. P. P. Yamaguchi, *Journal of Polymer Science Part B: Polymer Physics*, 1997, **35**, 535-543.

8. P. B. McDaniel, J. M. Deitzel and J. W. J. P. Gillespie Jr, *Polymer*, 2015, 69, 148-158.
9. M. Dermeneva, E. Ivan'kova, V. Marikhin, L. Myasnikova, M. Yagovkina and E. Radovanova, *Journal of Physics: Conference Series. IOP Publishing*, 2018, 1038(1): 012058.
10. M. Khoshsefat, A. Dechal, S. Ahmadjo, S. M. M. Mortazavi, G. Zohuri, J. B. Soares, *European Polymer Journal*, 2019, 119, 229-238.
